# Supplementary material for: Genome-Wide Association Study Demonstrates the Role Played by the CD226 Gene in Rasa Aragonesa Sheep Reproductive Seasonality
Source: MDPI journal article supplement (doi:10.3390/ani11041171), 2021-04-19
Supplement: s1 [file s1]

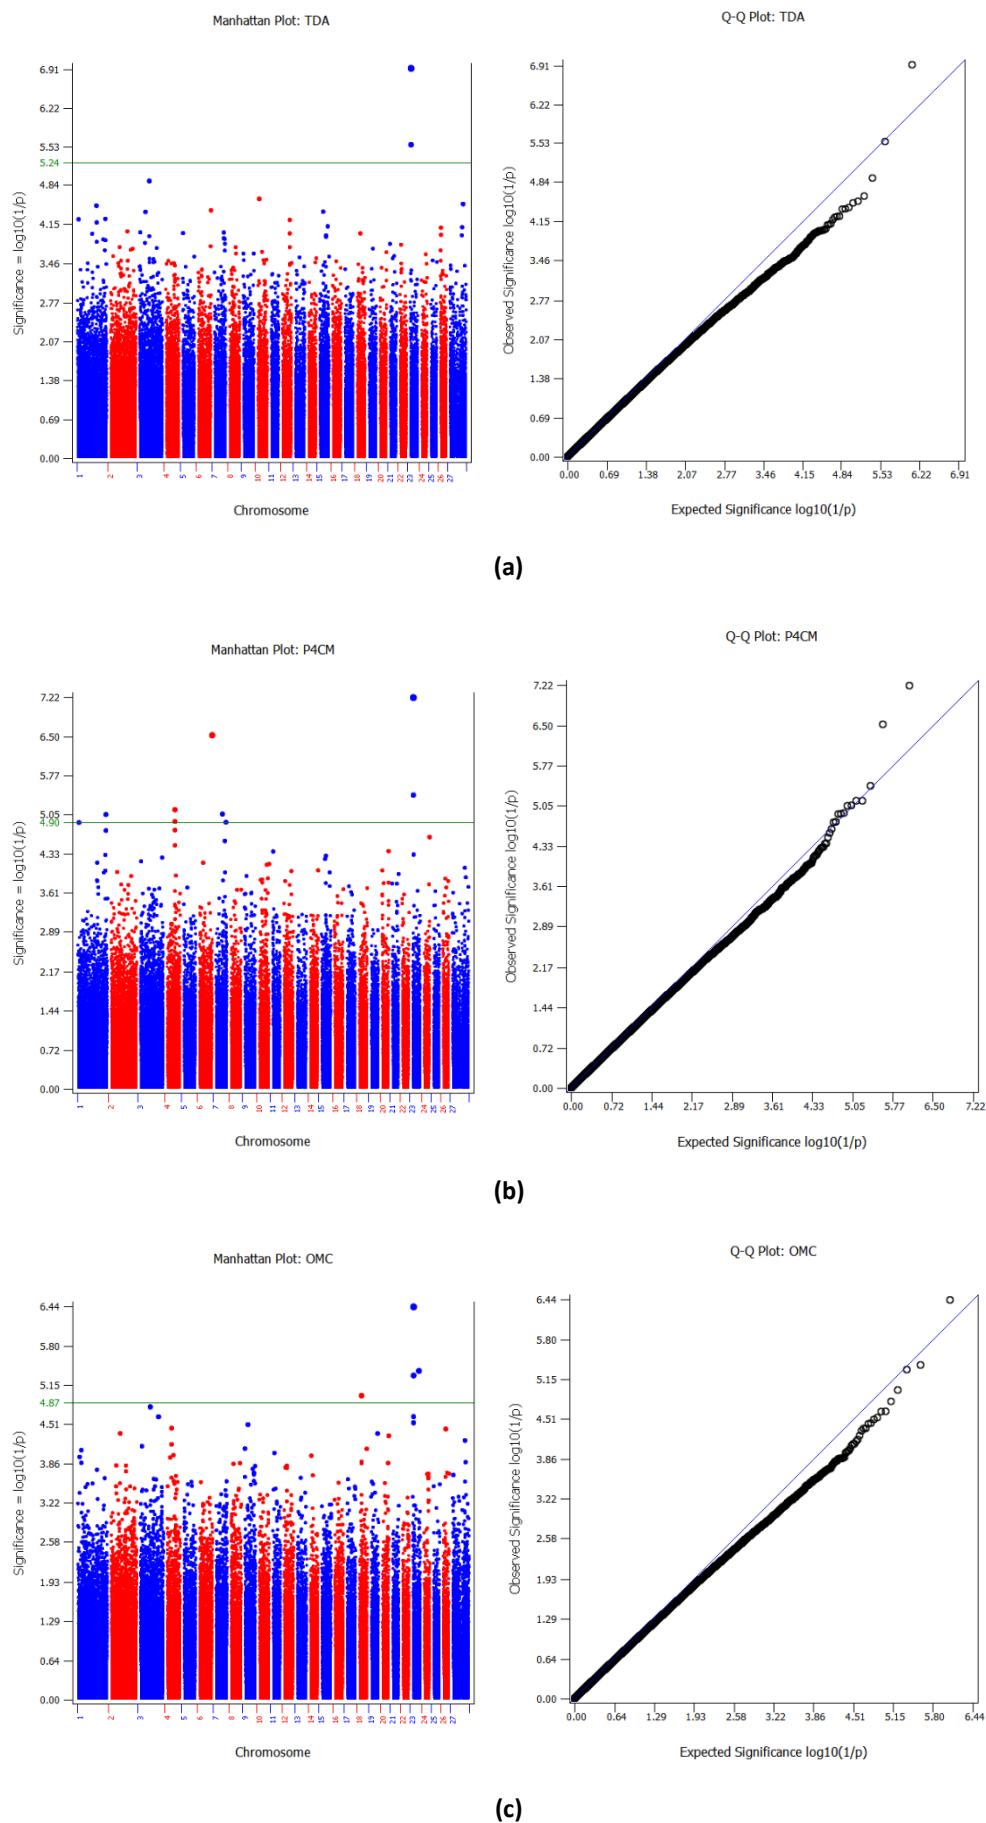

**Figure S2.** Manhattan and Q-Q plots from GWAS analysis for (a) TDA, (b) P4CM and (c) OCM traits in Rasa Aragonesa sheep breed. Chromosomes 1-26 and X (27) are shown. Horizontal green line in the Manhattan plot corresponds to the average threshold value for a FDR of 10% evaluated at the chromosomal level.
