# Supplementary material for: Genome-Wide Association Study Demonstrates the Role Played by the CD226 Gene in Rasa Aragonesa Sheep Reproductive Seasonality
Source: MDPI journal article supplement (doi:10.3390/ani11041171), 2021-04-19
Supplement: s1 [file s1]

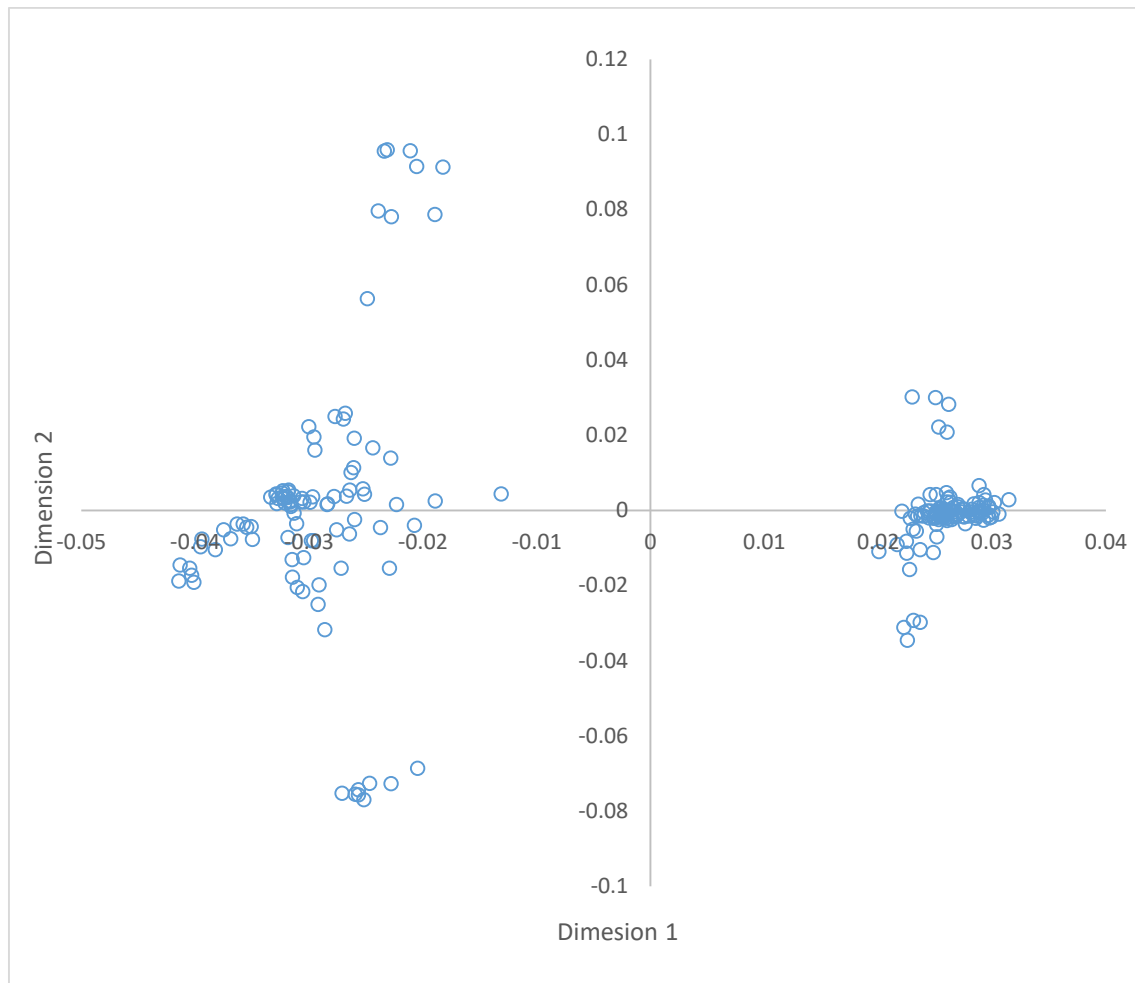

**Figure S1.** Multidimensional scaling (MDS) analysis performed with 188,633 SNPs after pruning in 205 ewes. The analysis showed the 4 clusters of animals included in analysis.
